# Supplementary material for: The earliest known titanosauriform sauropod dinosaur and the evolution of Brachiosauridae
Source: PeerJ. 2017 May 2;5:e3217. doi: 10.7717/peerj.3217 (PMC5417094; doi:10.7717/peerj.3217)
Supplement: Table S1 — Correlation scheme of the lithological units of Damparis with both synthetic geological successions of Franche-Comté region and of north-western Switzerland. [file peerj-05-3217-s003.xlsx]

## Sheet: Table 2
		AMMONITES (Głowniak, 2006, Fig. 1)				ZONES	TRANSVERSA-RIUM pars.		BIFURCATUS				BIMAMMA-TUM pars.
						SUB-ZONES	BUCKMANI pars.	ELISABETHAE	WARTAE		STENOCYCLOIDES	GROSSOUVREI	HYPSELUM
		AMMONITES (Gygi, 2012, Fig. 1.6)				ZONES	ANTECEDENS pars.	TRANSVERSARIUM	SCHILLI	ROTOIDES	STENOCYCLOIDES	BIFURCATUS	HYPSELUM	BERRENSE	BIMAMMATUM	GREDINGENSIS	PLANULA	GALAR
		AMMONITES (Cariou et al., 1997, Tab. X)				ZONES	TRANSVERSARIUM				BIFURCATUS		BIMAMMATUM				PLANULA
						SUB-ZONES	PARANDIERI	LUCIAEFORMIS	SCHILLI	ROTOIDES	STENOCYCLOIDES	GROSSOUVREI	SEMIMAMMATUM	BERRENSE	BIMAMMATUM	HAUFFIANUM	PLANULA	GALAR / GRANDIPLEX	References of ammonite and brachiopod biostratigraphic ranges
	AREA	UNIT	REFERENCES	LOCATION	ORIGIN	TAXONOMY
	SWITZERLAND		Gygi (2012)			GEISSBERG BEDS
			Gygi (2012)			EFFINGEN BEDS
			Gygi (2012)			BIRMENSTORF BEDS
	F-C	Calcaires de Besançon	Enay et al. (1988)	Coll. P. Duboz (Univ. Besançon)	Surmont (Cote 863) (Doubs)	Idoceras sp. Burckhardt 1906													Enay (1966)
	FRANCHE-COMTE	Marnes de Besançon	Enay et al. (1988)	Coll. D. Contini (Univ. Besançon)	Mamirolle (Doubs)	Orthosphinctes (Lithacosphinctes) n. sp. Enay 1966 aff. Perisphinctes (Arisphinctes) westburyensis Arkell 1947													Enay et al. (1988)
			Enay et al. (1988)	Coll. P. Poisot (Univ. Besançon)	Volon (Haute-Saône)	Orthosphinctes (Pseudorthosphinctes) albus (Quenstedt 1849)													Enay (1966)
			Enay et al. (1988)	Coll. D. Contini (Univ. Besançon)	Samson (Doubs) Etalans (Doubs)	Perisphinctes cf. panthieri Enay 1966													Enay (1966) Gygi (2012)
			Boullier et al. (1975) Enay et al. (1988)	Coll. Seigner	Damparis (Dole)	Perisphinctes (Ampthillia) cf. quadratus Enay 1966													Cariou et al. (1997)
			Enay et al. (1988)	Coll. Martin (x2) Coll. A. Boullier	Pessans/Samson (x2) & Etalans (Doubs)	Perisphinctes cf. stenocycloides (Siemiradzki 1898)													Cariou et al. (1997)
			Enay et al. (1988)	Coll. P. Duboz (Univ. Besançon)	Fessevillers (Doubs)	Perisphinctes (Dichotomoceras) cf. bifurcatoïdes Enay / Perisphinctes (Dichotomosphinctes) cf. bifurcatoïdes Enay 1966													Enay (1966) Cariou et al. (1997)
	FRANCHE-COMTE	Calcaires de l'Isle-sur-le-Doubs	Contini (1972) Enay et al. (1988)	Coll. P. Cailleteau (Univ. Besançon)	Besançon-Brégille (Doubs)	Idoceras planula gigas (Qu.) / Perisphinctes (Dichotomosphinctes) cf. bifurcatoïdes Enay 1966													Enay (1966)
			Contini (1972) Enay et al. (1988)	Coll. P. Cailleteau (Univ. Besançon)	Besançon-Brégille (Doubs)	Idoceras laxevolutum (Font.) / Perisphinctes (Dichotomoceras) wartae Bukowski 1887													Głowniak (2006)
			Duboz (1979) in Enay et al. (1988)		vicinity of Damprichard (Doubs)	Juralina bauhini (Etallon 1862)													Cariou et al. (1997)
			Glangeaud (1944) Enay et al. (1988)	Coll. P. Poisot (Univ. Besançon)	Roche-sur-Vannon (Haute-Saône)	Gregoryceras transversarium Quenstedt 1849													Cariou et al. (1997)
	DAMPARIS quarry	Calcaires hydrauliques de Champagnole	this study	Coll. A. Bougauld	Damparis (Jura)	Perisphinctes (Dichotomoceras) gr. wartae Bukowski 1887													Głowniak (2006)
			this study	Coll. GPMFC Dole section	Damparis (Jura)	Ochetoceras canaliculatum (Von Buch 1831)													Quereilhac (2013)
	DOLE vicinity	Calcaires hydrauliques (top 3-4 m)	Boullier et al. (1975)		vicinity of Dole (Jura)	Rhynchonella pectunculoides ET. / Septaliphoria pinguis (Roemer 1836)													Cariou et al. (1997)
			Roux (1971) in Boullier et al. (1975)		vicinity of Dole (Jura)	Orthosphinctes gr. polygyratus / ? Orthosphinctes (Pseudorthosphinctes) albus (Quenstedt 1849)													Enay (1966)
			Boullier et al. (1975)		vicinity of Dole (Jura)	Larcheria sp.													Cariou et al. (1997)
			Boullier et al. (1975)		vicinity of Dole (Jura)	Terebratula bourgueti ET. / Galliennithyris bourgueti Etallon 1862													Cariou et al. (1997)
	DOLE vicinity	Calcaires hydrauliques de Champagnole	Kuntz (1955) in Boullier et al. (1975)		vicinity of Dole (Jura)	Perisphinctes (Dichotomosphinctes) gr. wartae BUKOW. / Perisphinctes (Dichotomoceras) gr. wartae Bukowski 1887													Głowniak (2006)
			Boullier et al. (1975)		vicinity of Dole (Jura)	Ochetoceras canaliculatum (Von Buch 1831) [M]													Quereilhac (2013)
			Roux (1971) in Boullier et al. (1975)		vicinity of Dole (Jura)	Glochiceras subclausum (Oppel 1863) [m]													Quereilhac (2013)
			Boullier et al. (1975)		vicinity of Dole (Jura)	Terebratula rollieri Auctorum / Moeschia alata (Rollet 1972)													Courville & Boullier (2014)
