# Supplementary material for: The earliest known titanosauriform sauropod dinosaur and the evolution of Brachiosauridae
Source: PeerJ. 2017 May 2;5:e3217. doi: 10.7717/peerj.3217 (PMC5417094; doi:10.7717/peerj.3217)
Supplement: Table S2 — Taxon names and stratigraphical ranges have been updated from original publications and different sources respectively. Only two taxa (highlighted in yellow) are still affected by taxonomic vs. stratigraphic inconsistencies. [file peerj-05-3217-s004.xlsx]

## Sheet: Table 1
	Boullier et al (1975), this study			Jourdy (1866, 1871)	Chauve et al. (1979)					Enay et al. (1988), Contini (1989)								This study		Gygi et al. (1998), Gygi (2000, 2012)
	Latest lithostratigraphical descriptions of Upper Oxfordian limestones in the surroundings of Dole			First lithostratigraphical descriptions of Upper Oxfordian limestones in the surroundings of Dole	Explanations on the Dole sheet of the 1:50000 geological map					Regional litho- bio- and cyclostratigraphical definitions and correlations								Regional lithostratigraphical correlations		Swiss regional platform lithostratigraphical scheme and correlations with cyclostratigraphy and chronology
	Units exposed in the Damparis quarry in stratigraphical order		Unit thickness		"Outdated" facies names	Local formations			Stage names	Carbonated platform		Basin		Ammonites		Cyclostratigraphy		Carbonated platform		Carbonated platform		Sequential stratigraphy		Stage names
	FR	EN		Lithological units		EN	FR	Code		Formations	Members	Formations	Members	Zones	Subzones	Sequences	Sub-sequences	Formations	Members	Formations	Members	2nd order T-R cycles	3rd order T-R cycles
	marnes grises sableuses supérieures à foraminifères et ostracodes [environs]	upper grey sandy marls with foraminifera and ostracods [vicinity]	5-6 m	5ème sous-groupe Séquanien / 5th Sequanian subgroup	upper "Sequanian" / Séquanien supérieur	Calcaires oolithiques et bioclastiques, marnes	Oolithic and bioclastic limestones and marls	J7b	Kimme-ridgian (pars)	Marnes de Besançon (pars infra) / Besançon marls (pars infra)		Calcaires lités (pars infra) + Couches du Geisberg + Couches d'Effingen / Bedded Limestones (pars infra) + Geissberg Beds + Effingen Beds		Bimam-matum + Bifurcatus		S2	S2b (pars infra)	Marnes à pseudo-cyclammines		Reuchenette (pars infra)		Trans-gression	Kim 1	Kimme-ridgian (pars infra)
	calcaires graveleux supérieurs [forage ou environs]	upper gravelly limestones [core or vicinity]	6 m	4ème sous-groupe Séquanien / 4th Sequanian subgroup	middle "Sequanian" / Séquanien moyen				Late Oxfordian									Calcaires de Besançon		Courgenay	Porrentruy		Ox 8	Upper Oxfordian
																					La May		Ox 7
	marnes et calcaires [forage ou environs]	marls and limestones [core or vicinity]	9 m	3ème sous-groupe Séquanien / 3th Sequanian subgroup														Marnes de Besançon		Vellerat	Bure
													Banc à oncoïdes				S2a				Hauptmumienbank		Ox 6
																					Röschenz
	calcaires graveleux inférieurs	lower gravelly limestones	13 m	2ème sous-groupe Séquanien / 2nd Sequanian subgroup	lower "Sequanian" / Séquanien inférieur	Calcaires blancs massifs	White massive limestones	J7a							Steno-cycloides + Rotoides + Schilli							Regres-sion	Ox 5
													Banc à momies
	calcaires fins	fine limestones (including dinosaurs fossils)	9-13 m	1er sous-groupe Séquanien / 1st Sequanian subgroup						Calcaires de Clerval / Clerval limestones	Tidalites de Mouchard / M. tid. + Calcaires de l'Isle-sur-le-Doubs / L'I.-sur-le-D. Limest.	Couches de Birmenstorf (pars maxima) / Birmenstorf Beds (pars maxima)		Transver-sarium		S1 (pars supra)	S1b (pars supra)	Calcaires de Clerval / Clerval limestones	Most probably only Tidalites de Mouchard / Mouchard tidalites		Vorbourg
	calcaires massifs crayeux bioclastiques	massive chalky bioclastic limestones	6-9 m	4ème assise du Corallien / 4th Corallian beds	"Corallian", "Rauracian" / "Corallien", "Rauracien"	Calcaires massifs bioclastiques et oolithiques	Bioclastic and oolithic massive limestones	J6b	Upper Oxfordian	Oolithe corallienne de Pagnoz / Pagnoz coral oolite								Oolithe corallienne de Pagnoz / Pagnoz coral oolite		Sainte-Ursanne (pars supra)
	calcaires graveleux oolithiques et bioclastiques	gravelly oolithic and bioclastic limestones	1 m	3ème assise du Corallien / 3rd Corallian beds
	calcaires massifs bioclastiques à pâte fine	massive bioclastic limestones	7-10 m	2ème assise du Corallien / 2nd Corallian beds
	calcaires à polypiers	coral limestones	15-20 m	1ère assise du Corallien / 1st Corallian beds		Calcaires à polypiers	Coral limestones	J6a
	calcaires hydrauliques (pars supra)	hydraulic limestones [alternating marls and limestones] (pars supra)	at least 15 m	Marnes de Dole / Dole marls	"Argovian" / "Argovien" (pars supra)	Calcaires hydrauliques (pars supra)	Hydraulic limestones (pars supra)	J4-5c (pars supra)	Middle Oxfordian (pars supra)	Calcaires hydrauliques de Champagnole (pars supra) / Champagnole hydraulic limestones (pars supra)					Schilli + Luciae-formis + Parandieri (pars supra)			Calcaires hydrauliques de Champagnole (pars supra) / Champagnole hydraulic limestones (pars supra)						Middle Oxfordian (pars supra)
